# Supplementary material for: Characteristics and Outcomes of Intracranial Hemorrhage in Cancer Patients Visiting the Emergency Department
Source: MDPI journal article supplement (doi:10.3390/jcm11030643), 2022-01-27
Supplement: s1 [file s1]

## SUPPLEMENTAL MATERIAL

**Table S1. Presenting symptoms for cancer patients with intracranial hemorrhage (n = 704)**

| Symptom               | No. of patients (%) |
|-----------------------|---------------------|
| Headache              | 297 (42.2)          |
| Altered mental status | 253 (35.9)          |
| Paresis/weakness      | 185 (26.3)          |
| Nausea/vomiting       | 145 (20.6)          |
| Fall/trauma           | 122 (17.3)          |
| Speech changes        | 79 (11.2)           |
| Seizure               | 72 (10.2)           |
| Dizziness             | 64 (9.1)            |
| Visual changes        | 45 (6.4)            |
| Loss of consciousness | 31 (4.4)            |
| Numbness              | 20 (2.8)            |

**Table S2. Characteristics of ICH in cancer patients**

| <b>Characteristic</b>       | <b>No. of patients (%)</b> |                        |                      | <b>P</b>         |
|-----------------------------|----------------------------|------------------------|----------------------|------------------|
|                             | <b>Total</b>               | <b>Spontaneous ICH</b> | <b>Traumatic ICH</b> |                  |
| Total                       | 704                        | 576                    | 128                  |                  |
| ICH location                |                            |                        |                      | <b>&lt;0.001</b> |
| Subdural hematoma           | 248 (35.2)                 | 169 (29.3)             | 79 (61.7)            |                  |
| Hemorrhagic metastasis      | 199 (28.3)                 | 192 (33.3)             | 7 (5.5)              |                  |
| Intraparenchymal hemorrhage | 74 (10.5)                  | 68 (11.8)              | 6 (4.7)              |                  |
| Subarachnoid hemorrhage     | 62 (8.8)                   | 41 (7.1)               | 21 (16.4)            |                  |
| Hemorrhage in primary tumor | 40 (5.7)                   | 36 (6.3)               | 4 (3.1)              |                  |
| Intraventricular hemorrhage | 25 (3.6)                   | 19 (3.3)               | 6 (4.7)              |                  |
| Postsurgical hemorrhage     | 17 (2.4)                   | 17 (3.0)               | 0 (0.0)              |                  |
| Cerebellar hemorrhage       | 17 (2.4)                   | 16 (2.8)               | 1 (0.8)              |                  |
| Basal ganglia hemorrhage    | 9 (1.3)                    | 8 (1.4)                | 1 (0.8)              |                  |
| Brainstem hemorrhage        | 3 (0.4)                    | 3 (0.5)                | 0 (0.0)              |                  |
| Epidural hematoma           | 8 (1.1)                    | 5 (0.9)                | 3 (2.3)              |                  |
| Thalamic hemorrhage         | 2 (0.3)                    | 2 (0.3)                | 0 (0.0)              |                  |
| Associated edema            |                            |                        |                      | <b>&lt;0.001</b> |
| No                          | 372 (52.8)                 | 277 (48.1)             | 95 (74.2)            |                  |
| Yes                         | 332 (47.2)                 | 299 (51.9)             | 33 (25.8)            |                  |
| Midline shift               |                            |                        |                      | 0.087            |
| No                          | 463 (65.8)                 | 370 (64.2)             | 93 (72.7)            |                  |
| Yes                         | 241 (34.2)                 | 206 (35.8)             | 35 (27.3)            |                  |
| Herniation                  |                            |                        |                      | 0.646            |
| No                          | 611 (86.8)                 | 502 (87.2)             | 109 (85.2)           |                  |
| Yes                         | 93 (13.2)                  | 74 (12.8)              | 19 (14.8)            |                  |
| Hydrocephalus               |                            |                        |                      | 0.434            |
| No                          | 627 (89.1)                 | 510 (88.5)             | 117 (91.4)           |                  |
| Yes                         | 77 (10.9)                  | 66 (11.5)              | 11 (8.6)             |                  |

Abbreviations: ICH, intracranial hemorrhage. Boldface indicates statistical significance.

**Table S3. Types of brain herniation in cancer patients presenting with intracranial hemorrhage**

| <b>Herniation type</b>                 | <b>No. of patients*</b> |
|----------------------------------------|-------------------------|
| Subfalcine herniation                  | 35 (5.0%)               |
| Uncal herniation                       | 30 (4.3%)               |
| Transtentorial except Uncal herniation | 19 (2.7%)               |
| Cerebellar tonsillar herniation        | 14 (2.0%)               |
| Others or undefined                    | 17 (2.4%)               |

\*Some patients had more than one type of herniation at the same time

**Table S4. Primary cancer type for the metastatic brain lesions**

| <b>Primary cancer type</b> | <b>No. of patients (%)</b> |
|----------------------------|----------------------------|
| Melanoma                   | 94 (47.2)                  |
| Lung                       | 37 (18.6)                  |
| Breast                     | 15 (7.5)                   |
| Sarcoma                    | 12 (6.0)                   |
| Kidney                     | 7 (3.5)                    |
| Thyroid                    | 6 (3.0)                    |
| Gastrointestinal           | 6 (3.0)                    |
| Head and neck              | 4 (2.0)                    |
| Others                     | 18 (9.0)                   |

**Table S5. Radiological findings stratified by bleeding type**

| <b>Radiological finding</b> | <b>No. of patients (%)</b>           |                                         |                         | <b><i>P</i></b> |
|-----------------------------|--------------------------------------|-----------------------------------------|-------------------------|-----------------|
|                             | <b>Intra-metastatic<br/>bleeding</b> | <b>Intra-primary<br/>tumor bleeding</b> | <b>Other<br/>bleeds</b> |                 |
| Associated edema            |                                      |                                         |                         | <0.001          |
| No                          | 48 (24.1)                            | 13 (32.5)                               | 311 (66.9)              |                 |
| Yes                         | 151 (75.9)                           | 27 (67.5)                               | 154 (33.1)              |                 |
| Midline shift               |                                      |                                         |                         | 0.006           |
| No                          | 146 (73.4)                           | 20 (50.0)                               | 297 (63.9)              |                 |
| Yes                         | 53 (26.6)                            | 20 (50.0)                               | 168 (36.1)              |                 |
| Herniation                  |                                      |                                         |                         | 0.228           |
| No                          | 178 (89.4)                           | 32 (80.0)                               | 401 (86.2)              |                 |
| Yes                         | 21 (10.6)                            | 8 (20.0)                                | 64 (13.8)               |                 |
| Hydrocephalus               |                                      |                                         |                         | 0.462           |
| No                          | 173 (86.9)                           | 35 (87.5)                               | 419 (90.1)              |                 |
| Yes                         | 26 (13.1)                            | 5 (12.5)                                | 46 (9.9)                |                 |

**Table S6. Univariate analysis of the association between clinical factors and hospital outcomes in cancer patients with intracranial hemorrhage**

| Variable                                            | Hospital LOS†      |                  | ICU admission    |                  |
|-----------------------------------------------------|--------------------|------------------|------------------|------------------|
|                                                     | OR (95% CI)        | P                | OR (95% CI)      | P                |
| Age <65 years (compared with ≥65 years)             | 0.71 (0.14-3.53)   | 0.677            | 0.98 (0.72-1.34) | 0.904            |
| Male (compared with female)                         | 0.86 (0.18-4.07)   | 0.846            | 0.81 (0.60-1.09) | 0.162            |
| White (compared with non-White)                     | 0.82 (0.15-4.53)   | 0.818            | 0.96 (0.69-1.34) | 0.815            |
| CCI                                                 | 0.66 (0.50-0.86)   | <b>0.002</b>     | 0.98 (0.93-1.03) | 0.372            |
| Hematologic malignancy (compared with solid tumors) | 13.45 (2.86-63.22) | <b>0.001</b>     | 1.88 (1.39-2.55) | <b>&lt;0.001</b> |
| Active cancer status                                | 0.16 (0.01-1.96)   | 0.150            | 0.71 (0.43-1.14) | 0.164            |
| Active cancer therapy                               | 0.34 (0.07-1.78)   | 0.202            | 0.89 (0.65-1.23) | 0.479            |
| Hypertension                                        | 4.02 (0.85-19.09)  | 0.079            | 1.63 (1.20-2.21) | <b>0.002</b>     |
| Hypercholesterolemia                                | 1.08 (0.16-7.45)   | 0.939            | 1.48 (1.02-2.16) | 0.041            |
| Current smoker                                      | 0.1 (0.00-11.85)   | 0.340            | 1.29 (0.53-3.11) | 0.563            |
| Dysrhythmia                                         | 9.94 (0.60-163.39) | 0.108            | 1.22 (0.71-2.06) | 0.464            |
| Antiplatelets used within 90 days                   | 1.31 (0.04-41.39)  | 0.879            | 1.22 (0.63-2.34) | 0.542            |
| Anticoagulants used within 90 days                  | 0.71 (0.08-6.66)   | 0.766            | 0.69 (0.44-1.08) | 0.110            |
| Hemoglobin level, gm/dL                             | 0.73 (0.53-1.01)   | 0.057            | 0.90 (0.85-0.96) | <b>0.002</b>     |
| Intratumor bleeding                                 | 0.10 (0.02-0.49)   | <b>0.005</b>     | 0.47 (0.33-0.65) | <b>&lt;0.001</b> |
| Platelet count (increment of 10)                    | 0.89 (0.84-0.95)   | <b>&lt;0.001</b> | 0.98 (0.96-0.99) | <b>&lt;0.001</b> |
| Platelet count <50 (compared with ≥50)              | 27.96 (5.20-150.4) | <b>&lt;0.001</b> | 2.22 (1.60-3.09) | <b>&lt;0.001</b> |

\*Abbreviations: LOS, length of stay; ICU, intensive care unit; OR, odds ratio; CI, confidence interval; CCI, Charlson comorbidity index.

†Patients who died in the hospital were excluded.

**Table S7. Mortality in cancer patients with intracranial hemorrhage, stratified by cancer type**

| <b>Cancer type</b>    | <b>No. of patients</b> | <b>No. of deaths (% of subgroup)</b> |                         |                         |
|-----------------------|------------------------|--------------------------------------|-------------------------|-------------------------|
|                       |                        | <b>7-day mortality</b>               | <b>30-day mortality</b> | <b>1-year mortality</b> |
| Brain and spinal cord | 89                     | 6 (6.7)                              | 13 (14.6)               | 49 (55.1)               |
| Breast                | 37                     | 2 (5.4)                              | 7 (18.9)                | 19 (51.4)               |
| Gastrointestinal      | 36                     | 6 (16.7)                             | 10 (27.8)               | 29 (80.6)               |
| Head and neck         | 21                     | 1 (4.8)                              | 6 (28.6)                | 13 (61.9)               |
| Leukemia              | 196                    | 31 (15.8)                            | 63 (32.1)               | 138 (70.4)              |
| Lung                  | 65                     | 7 (10.8)                             | 17 (26.2)               | 56 (86.2)               |
| Lymphoma              | 30                     | 1 (3.3)                              | 4 (13.3)                | 15 (50.0)               |
| Melanoma              | 123                    | 13 (10.6)                            | 29 (23.6)               | 91 (74.0)               |
| Multiple myeloma      | 24                     | 6 (25.0)                             | 12 (50.0)               | 17 (70.8)               |
| Other                 | 60                     | 3 (5.0)                              | 9 (15.0)                | 31 (51.7)               |
| Sarcoma               | 23                     | 4 (17.4)                             | 10 (43.5)               | 18 (78.3)               |

**Table S8. Mortality rates and ICU admission stratified by intracranial hemorrhage type**

| <b>Outcome</b>           | <b>Intraparenchymal<br/>hemorrhage</b> | <b>Subdural<br/>hematoma</b> | <b>Intraventricular<br/>hemorrhage</b> | <b>Hemorrhagic<br/>tumor</b> | <b>Subarachnoid<br/>hemorrhage</b> | <b>Others</b> | <b><i>P</i></b> |
|--------------------------|----------------------------------------|------------------------------|----------------------------------------|------------------------------|------------------------------------|---------------|-----------------|
| Total                    | 74                                     | 248                          | 25                                     | 239                          | 62                                 | 56            |                 |
| In-hospital<br>mortality | 25 (33.8)                              | 45 (18.1)                    | 2 (8.0)                                | 18 (7.5)                     | 8 (12.9)                           | 8 (14.3)      | <0.001          |
| 7-days<br>mortality      | 21 (28.4)                              | 26 (10.5)                    | 3 (12.0)                               | 17 (7.1)                     | 6 (9.7)                            | 7 (12.5)      | <0.001          |
| 30-days<br>mortality     | 31 (41.9)                              | 65 (26.2)                    | 7 (28.0)                               | 57 (23.9)                    | 10 (16.1)                          | 10<br>(17.9)  | 0.009           |
| ICU<br>admission         | 44 (59.5)                              | 107 (43.1)                   | 15 (60.0)                              | 71 (29.7)                    | 31 (50.0)                          | 24<br>(42.9)  | <0.001          |

\*Abbreviations: ICU, intensive care unit.

**Table S9. Univariate analysis of the association between clinical factors and short-term mortality in cancer patients with intracranial hemorrhage**

| Variable                                            | In-hospital mortality |                  | 7-day mortality  |                  | 30-day mortality |                  |
|-----------------------------------------------------|-----------------------|------------------|------------------|------------------|------------------|------------------|
|                                                     | OR (95% CI)           | P                | OR (95% CI)      | P                | OR (95% CI)      | P                |
| Age <65 years (compared with ≥65 years)             | 0.80 (0.53-1.22)      | 0.290            | 0.67 (0.42-1.07) | 0.093            | 0.85 (0.60-1.21) | 0.366            |
| Male (compared with female)                         | 0.79 (0.52-1.19)      | 0.263            | 0.69 (0.43-1.11) | 0.126            | 0.73 (0.52-1.02) | 0.069            |
| White (compared with non-White)                     | 0.89 (0.57-1.40)      | 0.596            | 1.17 (0.70-2.02) | 0.562            | 1.05 (0.72-1.53) | 0.814            |
| CCI                                                 | 0.98 (0.92-1.06)      | 0.676            | 0.99 (0.92-1.08) | 0.884            | 1.04 (0.98-1.10) | 0.178            |
| Hematologic malignancy (compared with solid tumors) | 2.17 (1.42-3.36)      | <b>&lt;0.001</b> | 1.37 (0.86-2.19) | 0.189            | 1.18 (0.84-1.65) | 0.346            |
| Active cancer status                                | 0.90 (0.44-1.70)      | 0.765            | 0.73 (0.30-1.55) | 0.456            | 0.54 (0.28-0.97) | 0.051            |
| Active cancer therapy                               | 1.23 (0.79-1.96)      | 0.361            | 1.26 (0.76-2.14) | 0.376            | 1.62 (1.12-2.39) | <b>0.013</b>     |
| Hypertension                                        | 1.05 (0.69-1.58)      | 0.828            | 1.10 (0.68-1.75) | 0.701            | 0.98 (0.70-1.38) | 0.913            |
| Current smoker                                      | 1.34 (0.38-3.71)      | 0.605            | 1.31 (0.30-3.98) | 0.671            | 0.91 (0.29-2.35) | 0.848            |
| Dysrhythmia                                         | 1.43 (0.70-2.71)      | 0.294            | 1.83 (0.87-3.56) | 0.091            | 1.14 (0.62-2.01) | 0.672            |
| Antiplatelets used within 90 days                   | 1.49 (0.62-3.20)      | 0.330            | 0.64 (0.15-1.82) | 0.459            | 0.74 (0.31-1.56) | 0.455            |
| Anticoagulants used within 90 days                  | 1.04 (0.55-1.83)      | 0.904            | 0.88 (0.41-1.70) | 0.721            | 0.95 (0.57-1.54) | 0.834            |
| Intratumor bleeding                                 | 0.35 (0.20-0.58)      | <b>&lt;0.001</b> | 0.49 (0.27-0.84) | <b>0.013</b>     | 0.88 (0.61-1.25) | 0.472            |
| Platelet count (increment of 10)                    | 0.95 (0.93-0.97)      | <b>&lt;0.001</b> | 0.97 (0.95-0.99) | <b>0.003</b>     | 0.97 (0.96-0.99) | <b>&lt;0.001</b> |
| Platelet count <50 (compared with ≥50)              | 3.41 (2.24-5.23)      | <b>&lt;0.001</b> | 2.57 (1.60-4.13) | <b>&lt;0.001</b> | 2.24 (1.57-3.19) | <b>&lt;0.001</b> |
| Hemoglobin level, gm/dL                             | 0.83 (0.76-0.91)      | <b>&lt;0.001</b> | 0.90 (0.81-0.99) | <b>0.036</b>     | 0.86 (0.80-0.93) | <b>&lt;0.001</b> |

\*Abbreviations: OR, odds ratio; CI, confidence interval; CCI, Charlson comorbidity index. Boldface indicates statistical significance.



**Table S10. Univariate analysis of the association between radiologic findings and short-term mortality in cancer patients with intracranial hemorrhage**

| <b>Radiologic finding</b> | <b>In-hospital mortality</b> |                  | <b>7-day mortality</b> |                  | <b>30-day mortality</b> |                  |
|---------------------------|------------------------------|------------------|------------------------|------------------|-------------------------|------------------|
|                           | <b>OR (95% CI)</b>           | <b><i>P</i>*</b> | <b>OR (95% CI)</b>     | <b><i>P</i>*</b> | <b>OR (95% CI)</b>      | <b><i>P</i>*</b> |
| Edema                     | 1.14 (0.76-1.73)             | 0.525            | 1.6 (1.01-2.58)        | <b>0.049</b>     | 1.28 (0.91-1.80)        | 0.154            |
| Midline shift             | 2.39 (1.57-3.64)             | <b>&lt;0.001</b> | 3.37 (2.10-5.48)       | <b>&lt;0.001</b> | 1.65 (1.16-2.34)        | <b>0.005</b>     |
| Herniation                | 6.23 (3.84-10.11)            | <b>&lt;0.001</b> | 9.34 (5.56-15.75)      | <b>&lt;0.001</b> | 4.78 (3.04-7.55)        | <b>&lt;0.001</b> |
| Hydrocephalus             | 2.79 (1.60-4.74)             | <b>&lt;0.001</b> | 4.61 (2.62-7.98)       | <b>&lt;0.001</b> | 2.94 (1.80-4.77)        | <b>&lt;0.001</b> |

\*Boldface indicates statistical significance

**Table S11. Anticoagulant agents (excluding heparin) used in cancer patients with ICH**

| <b>Anticoagulant agent</b> | <b>No. of patients (%)</b> |                                   |                                 |
|----------------------------|----------------------------|-----------------------------------|---------------------------------|
|                            | <b>Total,<br/>n=704</b>    | <b>Spontaneous<br/>ICH, n=576</b> | <b>Traumatic<br/>ICH, n=128</b> |
| Enoxaparin                 | 90 (12.8)                  | 73 (12.7)                         | 17 (13.3)                       |
| Dalteparin                 | 5 (0.7)                    | 5 (0.9)                           | 0 (0.0)                         |
| Warfarin                   | 9 (1.3)                    | 3 (0.5)                           | 6 (4.7)                         |

\*Abbreviations: ICH, intracranial hemorrhage.
